# Supplementary material for: Coseismic deformation obtained from surface ocean currents in a flat bottom ocean
Source: Research Square preprint supplement (doi:10.21203/rs.3.rs-7067951/v1), 2025-07-09
Supplement: Supplementary file 1 [file 16953e999af047404c705e93.pdf]

Supplementary Information  
Coseismic deformation obtained from surface  
ocean currents in a flat bottom ocean

Rodrigo Cifuentes-Lobos<sup>1</sup>, Jörn Behrens<sup>1\*†</sup>, Ignacia Calisto<sup>2†</sup>

<sup>1\*</sup>Department of Mathematics, Universität Hamburg, Bundesstraße 55,  
Hamburg, 20146, Germany.

<sup>2</sup>Departamento de Geofísica, Universidad de Concepción, Victor Lamas  
1290, Concepción, 4070386, Chile.

\*Corresponding author(s). E-mail(s): [joern.behrens@uni-hamburg.de](mailto:joern.behrens@uni-hamburg.de);  
Contributing authors: [rodrigo.cifuentes.lobos@uni-hamburg.de](mailto:rodrigo.cifuentes.lobos@uni-hamburg.de);  
[icalisto@dgeo.udec.cl](mailto:icalisto@dgeo.udec.cl);

<sup>†</sup>These authors contributed equally to this work.

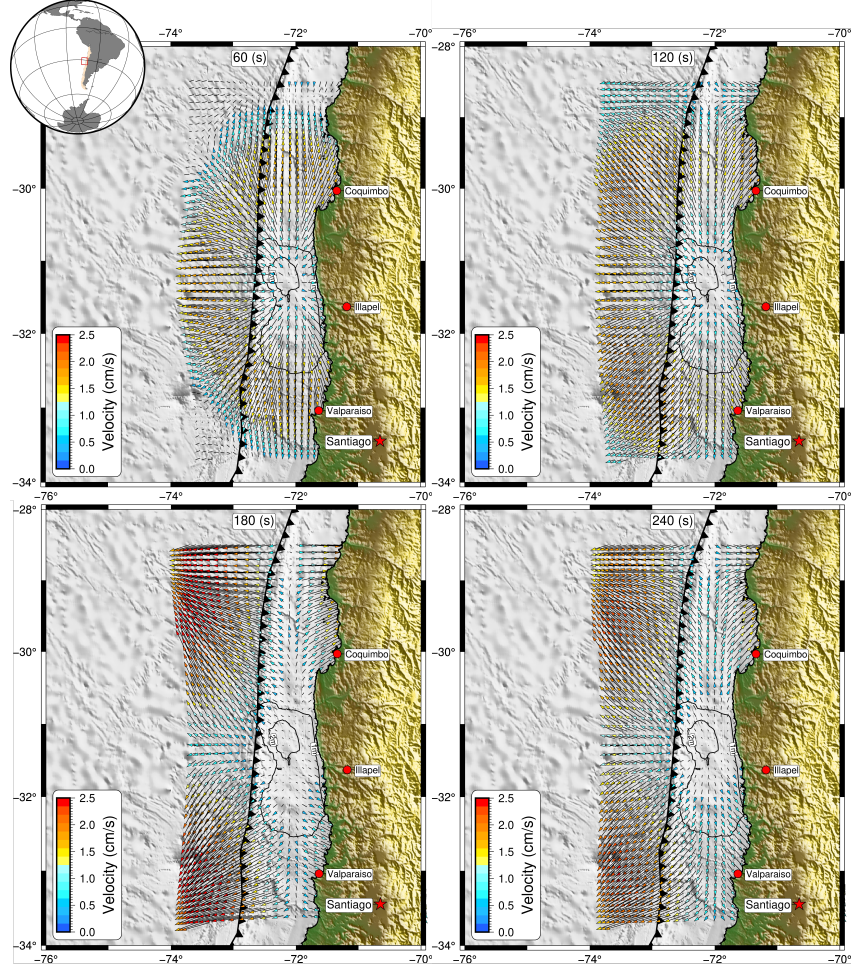

**Fig. S1** Examples of surface currents induced by the instantaneous deformation of the uplift model B.1 after 1, 2, 3 and 4 minutes

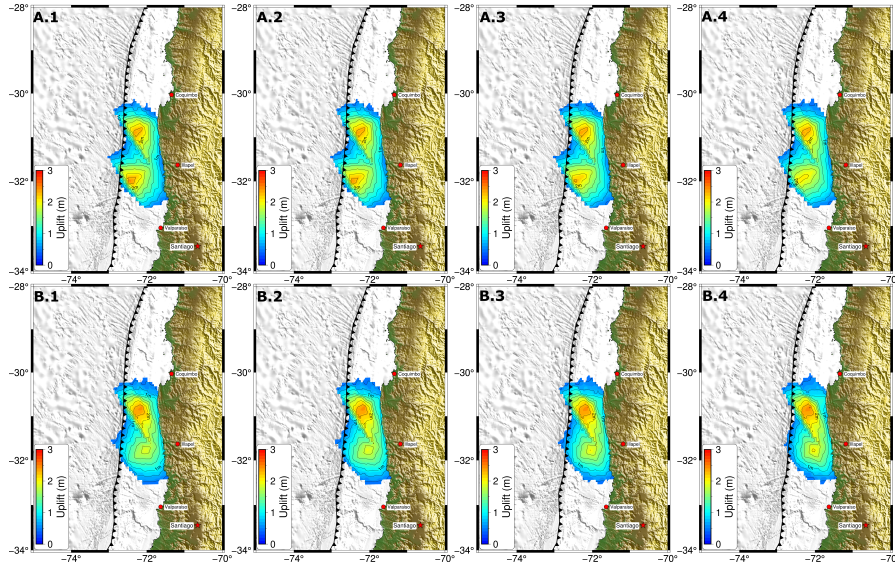

**Fig. S2** Uplift models used in the Illapel 2015 earthquake tests

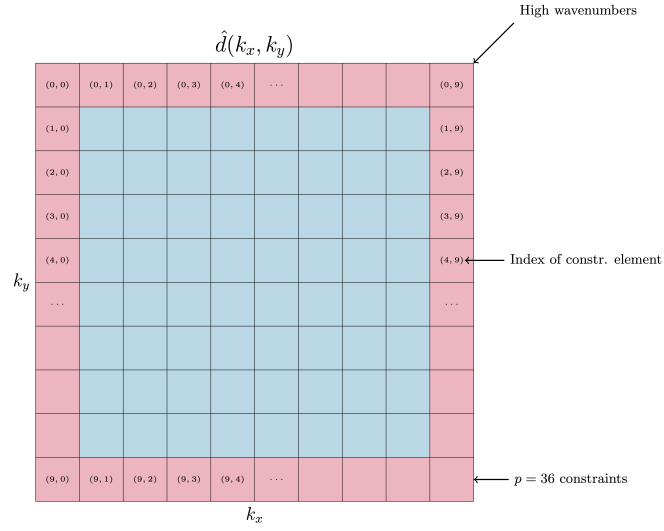

**Fig. S3** Example of a  $10 \times 10$  deformation field in the wavenumber domain  $\hat{d}(k_x, k_y)$ . The border related to the biggest magnitudes of wavenumbers is highlighted. In this example, it will be forced to be 0 with the linear constraints equation  $\mathbf{H}\hat{\mathbf{d}} = \mathbf{h}$ .

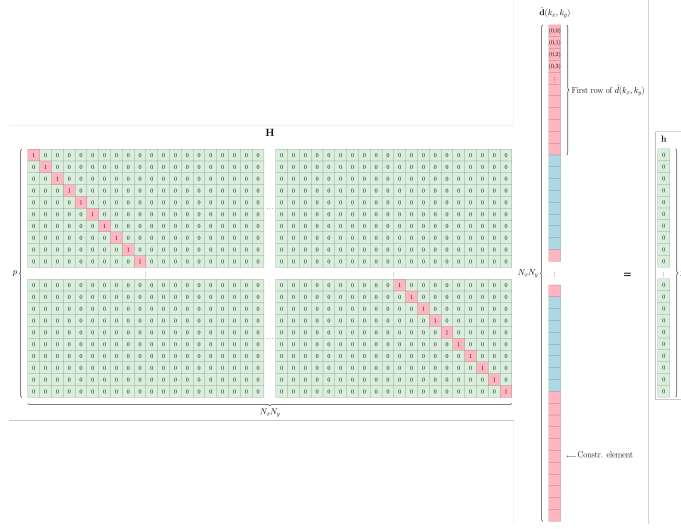

**Fig. S4** Examples of the construction of the linear constraint matrices  $\mathbf{H}$  and  $\mathbf{h}$  to force the outer ring of the inverted  $\hat{d}(k_x, k_y)$  to be zero. More elements, if wanted, can be set to zero. Each row of matrix  $\mathbf{H}$  affects one entry of the target  $\hat{\mathbf{d}}$ , setting to zero said entry if the row contains a value one or not if it's comprised of all zeros

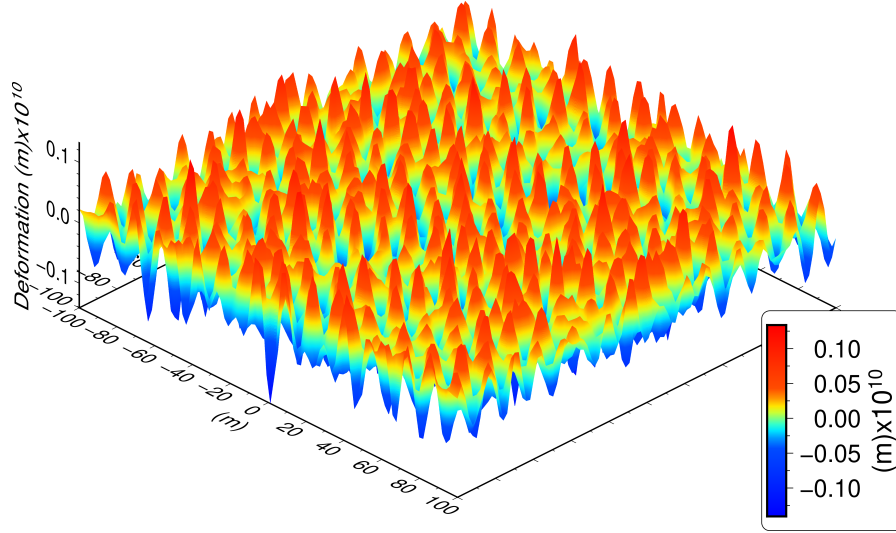

**Fig. S5** Example of inversion of the Gaussian Bell using a generalized Moore-Penrose inverse with a SVD truncated at the rank of the matrices  $\text{rank}(\mathbf{G}_x) = \text{rank}(\mathbf{G}_y) = 615$ . The regularization given by neglecting more smaller singular values doesn't allow to recover the original input deformation
